# Supplementary material for: Effects of Orientation and Dispersion on Electrical Conductivity and Mechanical Properties of Carbon Nanotube/Polypropylene Composite
Source: MDPI journal article supplement (doi:10.3390/polym15102370), 2023-05-19
Supplement: s1 [file s1]

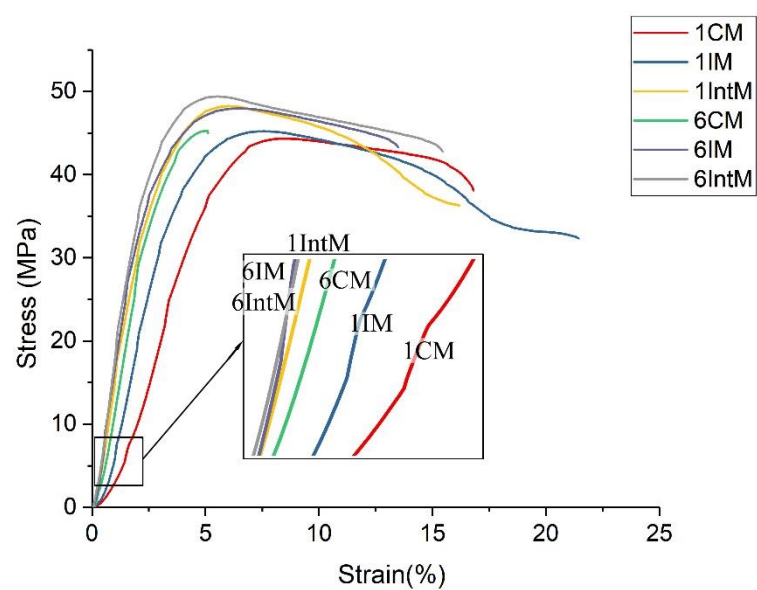

**Figure S1.** Stress-strain curves of PP/CNT composites

IntM samples formed by high shear stress can get a higher modulus at any CNT content. While the modulus of IM and CM can be increased by CNTs.
